# Supplementary material for: Lactiplantibacillus plantarum O126 postbiotics boost growth, antioxidant levels, disease resistance, and gut health in sea cucumber (Apostichopus japonicus)
Source: Research Square preprint supplement (doi:10.21203/rs.3.rs-7545463/v1), 2025-12-08
Supplement: Supplementary file 1 [file 7619b230c852da338aa7e533.docx]

| **Table S1:** Formulation and composition of basical diet. | |
| --- | --- |
| Ingredient | Content% |
| Sargassum | 42.80 |
| Kelp powder | 20.00 |
| Ulva powder | 10.00 |
| White fish meal | 10.00 |
| Wheat starch | 10.00 |
| Ethoxyquin | 0.2 |
| Vitamin mixture1 | 1.00 |
| Mineral mixture2 | 1.00 |
| Carboxymethyl cellulose sodium | 5.00 |
| Total | 100 |
| Nutrient levels |  |
| Moisture | 9.00 |
| Crude protein | 12.69 |
| Crude lipid | 0.70 |
| Ash | 43.8 |
| Note:1Vitamin mixture (mg/kg of premix): Vitamin A, 400; Vitamin D3, 8; Vitamin E, 450; Vitamin B1, 1500; Vitamin B2, 1500; Vitamin B6, 40; Folic acid, 30; Niacin, 800; Calcium carbonate, 200; Inositol, 4000; Biotin, 12; Vitamin B12, 18; Ascorbic acid, 4000; Water < 10%  2Mineral mixture (mg/40g of premix): NaCl, 108.18; MgSO4.7H2O, 370.15; NaH2PO4.2H2O, 232.82; KH2PO4, 655.18; Ca(H2PO4) 2H2O, 376.70; Al(OH)3, 0.48; ZnSO4.7H2O, 8.90; CuSO4, 0.28; MnSO4·7H2O, 2.53; Ca(IO3)2, 0.33. | |

| **Table S2:** The primers of genes for RT-qRCR. | |
| --- | --- |
| Gene name | Primers sequence（5'-3'） |
| *PRDX5* | F: TATTCACTCCTGGCTGCTCTAAG  R: TGTGAAGTCACAGCAGGTATCAG |
| *PRDX6* | F: TCGAGTCTTGGATTCTCTACAGC  R: TGGTACCTCCTTAATGGTCACAC |
| *Rel* | F: TGAAGGTGGTATGCGTCTGG  R: TTGGGCTGCTCGGTTATG |
| *p50* | F: TCCTATCGGTCTGAATCTTCCAA  R: TTTCTTCCCTTTCTGGCTATGTTC |
| *C3-2* | F: CTCTCGTGAGTTCTGGCTCAG  R: GCAGCCACTGTTACCATCGCGGA |
| *β-actin* | F: TTATGCTCTTCCTCACGCTATCC  R: TTGTGGTAAAGGTGTAGCCTCTCTC |
| *β-**tubulin* | F: GAAAGCCTTACGACGGAACA  R: CACCACGTGGACTCAAAATG |
| *16S ribosomal RNA* | F: CCTAYGGGRBGCASCAG |
|  | R: GGACTACNNGGGTATCTAAT |
